# Supplementary material for: The relationship of ulnar variance with pathologies detected by magnetic resonance imaging in patients with chronic or subacute wrist pain
Source: PeerJ journal article supplement (doi:10.7717/peerj.18999), 2025-02-13
Supplement: supplemental_file_translated.xlsx [file supplemental_file_translated.xlsx]

## Sheet: Sheet1
Procedure Name	Procedure Time	Age	Gender	Ulnar variance type	Ganglion	Tendon Lesion	Bone Lesion	Muscle Lesion	TFCC	Mass	Fracture
MR, wrist joint (right)	2021-03-10 13:16:37	34	female	negative
MR, wrist joint (right)	2021-01-20 11:55:53	34	female	negative		scapholunate ligament rupture	lunate necrosis
MR, wrist joint (right)	2021-02-03 12:29:10	25	female
MR, wrist joint (right)	2021-03-12 10:51:21	60	female	positive				grade 2 strain in opponens pollicis and abductor pollicis brevis muscles
MR, wrist joint (right)	2021-01-25 15:47:47	50	female	positive
MR, wrist joint (right)	2021-03-31 13:14:34	37	female				bone cyst the capitate
MR, wrist joint (right)	2021-05-20 20:46:04	53	female	negative			bone cyst in the capitate
MR, wrist joint (right)	2020-02-18 12:55:29	20	male								(+)
MR, wrist joint (right)	2020-03-13 09:31:13	54	male			de quervai̇n	lunate cyst scaphoid and tetrum and trapezoidal cyst
MR, wrist joint (right)	2020-09-17 13:14:53	18	female	negative
MR, wrist joint (right)	2020-09-07 09:31:21	29	female		ganglion
MR, wrist joint (right)	2020-05-29 14:43:37	51	male	negative (impingement)			cyst in capitate	deformation, ulnar homologue rupture
MR, wrist joint (right)	2020-09-08 11:54:22	52	female			flexor digitorum profundus tendinosis	trapezoidal cyst	degeneration
MR, wrist joint (right)	2020-08-17 14:46:00	48	female	negative		extensor carpi ulnaris tendinosis		rupture
MR, wrist joint (right)	2020-05-13 15:24:28	45	male		ganglion
MR, wrist joint (right)	2020-10-20 14:40:57	27	female		ganglion
MR, wrist joint (right)	2020-10-28 14:20:31	52	female								(+)
MR, wrist joint (right)	2020-09-25 09:53:40	40	female								(+)
MR, wrist joint (right)	2020-10-10 09:46:15	42	female				edema in the lunate
MR, wrist joint (right)	2020-12-22 12:15:15	23	female	negative	ganglion
MR, wrist joint (left)	2021-04-17 22:32:14	42	female
MR, wrist joint (left)	2021-01-22 12:47:27	52	female	negative		extensor carpi radialis brevis and longus tendinosis.
MR, wrist joint (left)	2021-03-30 16:13:46	54	female			de quervai̇n	cyst in capitata
MR, wrist joint (left)	2021-01-20 11:51:30	48	female								(+)
MR, wrist joint (left)	2021-03-03 14:59:01	65	female			extensor carpi ulnaris, flexor digitorum profundus, and extensor carpi radialis brevis tendons (tendinosis)	capitate and lunate cyst		rupture
MR, wrist joint (left)	2021-05-11 10:06:32	58	female				cyst of ulna crystal tip and 1st metacarpal
MR, wrist joint (left)	2021-04-29 16:09:21	52	male		ganglion
MR, wrist joint (left)	2020-03-04 13:24:29	62	female				2nd metacarpal bone base, capitate bone, lunate bone, triquetum bone, medullary edema at the level of the styloid process distal to the ulna		rupture
MR, wrist joint (left)	2020-03-11 15:29:24	25	female
MR, wrist joint (left)	2020-04-30 13:11:59	48	female	positive	ganglion		millimetric cyst in triquetrum and capitatum		degeneration
MR, wrist joint (left)	2020-05-19 11:53:06	44	male		ganglion
MR, wrist joint (left)	2020-09-15 09:20:17	72	male		ganglion	extensor carpi ulnaris tendinosis
MR, wrist joint (left)	2020-11-03 11:26:47	30	female			ucl rupture and carpal tunnel syndrome			rupture
MR, wrist joint (left)	2020-11-11 10:07:18	34	male		ganglion	extensor carpi ulnaris tendinosis
MR, wrist, right, contrast enhanced	2023-07-28 11:24:52	59	male								(+)
MR, wrist, right, unenhanced	2022-03-04 09:52:03	21	male		ganglion
MR, wrist, right, unenhanced	2022-03-21 09:04:41	38	male	negative		scapholunate ligament rupture
MR, wrist, right, unenhanced	2022-02-24 09:55:07	24	female	negative		scapholunate ligament degeneration
MR, wrist, right, unenhanced	2022-01-12 13:56:48	69	male								(+)
MR, wrist, right, unenhanced	2022-03-25 14:56:21	31	male								(+)
MR, wrist, right, unenhanced	2022-02-21 15:14:36	40	female		ganglion		cyst in scafoid
MR, wrist, right, unenhanced	2022-07-01 10:12:41	33	male		ganglion
MR, wrist, right, unenhanced	2022-05-31 09:44:09	26	male			extensor carpi ulnaris tendinosis
MR, wrist, right, unenhanced	2022-08-24 11:22:22	49	male								(+)
MR, wrist, right, unenhanced	2022-06-22 14:58:41	78	female				1st metacarpal cyst
MR, wrist, right, unenhanced	2022-05-24 13:19:14	33	female				edema of the psiforme, lunate cyst
MR, wrist, right, unenhanced	2022-10-27 11:29:51	38	female	negative	ganglion		navicular cyst
MR, wrist, right, unenhanced	2022-09-04 14:17:10	38	male		ganglion	flexor carpi radialis (tendinosis)
MR, wrist, right, unenhanced	2022-10-31 12:09:03	21	female
MR, wrist, right, unenhanced	2023-05-17 09:22:53	51	male		ganglion
MR, wrist, right, unenhanced	2023-01-23 10:22:52	23	female
MR, wrist, right, unenhanced	2023-04-03 12:35:36	22	female	negative
MR, wrist, right, unenhanced	2023-07-25 12:06:15	51	male	negative		ucl sprain
MR, wrist, right, unenhanced	2023-05-05 09:52:15	38	male								(+)
MR, wrist, right, unenhanced	2023-05-25 10:05:50	18	male	negative
MR, wrist, right, unenhanced	2023-08-23 09:19:40	67	male			ucl rupture . tendinosis in all tendons			rupture
MR, wrist, right, unenhanced	2023-08-02 15:40:13	39	male	negative		extensor digitorum tendinosis			rupture
MR, wrist, right, unenhanced	2023-06-19 11:53:13	20	female
MR, wrist, right, unenhanced	2023-10-03 13:39:37	43	male			uclde sprain	medullary edema of the radius
MR, wrist, right, unenhanced	2023-10-10 11:16:17	36	female			cyst in capitatum
MR, wrist, right, unenhanced	2023-09-27 08:44:37	24	female		ganglion	cyst in trapezoideum and lunatum
MR, wrist, right, unenhanced	2023-09-29 14:50:49	33	male						rupture
MR, wrist, right, unenhanced	2023-10-18 21:41:59	32	male	negative					deformation
MR, wrist, right, unenhanced	2021-06-11 09:27:58	63	male		ganglion				rupture
MR, wrist, right, unenhanced	2021-07-09 16:52:39	45	male		ganglion
MR, wrist, right, unenhanced	2021-11-23 16:32:36	17	male	negative
MR, wrist, right, unenhanced	2021-11-08 09:57:05	47	male			cyst in capitatum, lunatum and trapesoideum
MR, wrist, right, unenhanced	2021-11-30 14:31:00	50	male			extensor digitorum tendinosis
MR, wrist, right, unenhanced	2021-12-04 13:42:39	52	female	negative	ganglion
MR, wrist, right, unenhanced	2021-11-14 14:34:28	54	female								(+)
MR, wrist, right, unenhanced	2021-10-15 10:09:44	50	male	negative		apl epl ecu tendinosis	lunat edema
MR, wrist, right, unenhanced	2021-12-18 12:04:19	21	male	negative (impingement)	ganglion				deformation
MR, wrist, left, contrast enhanced	2022-06-22 15:58:56	76	female		ganglion		lunat edema and cyst
MR, wrist, left, unenhanced	2022-02-08 16:53:26	18	male	negative (impingement)		ecu tendinosis			degeneration
MR, wrist, left, unenhanced	2022-03-15 08:57:29	18	female								(+)
MR, wrist, left, unenhanced	2022-02-22 10:42:41	27	female	negative (impingement)
MR, wrist, left, unenhanced	2022-03-26 11:42:35	55	male
MR, wrist, left, unenhanced	2022-03-17 11:09:56	41	female								(+)
MR, wrist, left, unenhanced	2022-06-14 14:51:20	26	male	negative					rupture
MR, wrist, left, unenhanced	2022-04-19 21:12:33	47	female	negative		ecu tendinosis
MR, wrist, left, unenhanced	2022-04-25 17:00:03	8	female							giant cell tumor
MR, wrist, left, unenhanced	2022-05-27 17:16:07	33	female
MR, wrist, left, unenhanced	2022-09-01 11:43:12	18	male	negative (impingement)
MR, wrist, left, unenhanced	2022-09-04 14:16:48	38	male	negative	ganglion		edema of the scaphoid
MR, wrist, left, unenhanced	2022-12-08 16:44:27	45	male	negative			edema of the scaphoid
MR, wrist, left, unenhanced	2022-09-07 14:43:12	12	male								(+)
MR, wrist, left, unenhanced	2022-09-28 09:22:55	61	female				trapezium scaphoid lunate medullary edema triquetrum cyst		rupture
MR, wrist, left, unenhanced	2022-09-29 16:18:22	18	male	negative							(+)
MR, wrist, left, unenhanced	2022-11-07 14:22:42	45	female		ganglion
MR, wrist, left, unenhanced	2022-10-02 13:48:00	21	female								(+)
MR, wrist, left, unenhanced	2023-01-12 12:40:48	64	female								(+)
MR, wrist, left, unenhanced	2023-03-07 13:51:45	25	female		ganglion
MR, wrist, left, unenhanced	2023-05-08 11:46:51	30	male	negative (impingement)
MR, wrist, left, unenhanced	2023-05-10 16:34:32	40	female	negative (impingement)	ganglion	extensor digitorum tendinosis
MR, wrist, left, unenhanced	2023-01-30 10:49:52	42	female								(+)
MR, wrist, left, unenhanced	2023-05-19 10:53:46	40	male
MR, wrist, left, unenhanced	2023-06-02 11:12:01	50	male	negative (impingement)		ecu tendinosis
MR, wrist, left, unenhanced	2023-05-22 16:59:45	31	male				cyst and edema in the lunate
MR, wrist, left, unenhanced	2023-05-24 12:23:40	31	male		ganglion
MR, wrist, left, unenhanced	2023-08-18 07:51:41	36	male				avulsion in the triquetrum
MR, wrist, left, unenhanced	2023-08-08 17:14:04	39	female								(+)
MR, wrist, left, unenhanced	2023-08-05 22:07:13	31	male			scapholunate rupture	lunate impaction		ulnar homolog rupture
MR, wrist, left, unenhanced	2023-07-06 11:11:41	26	female	negative			trapezoidal cyst
MR, wrist, left, unenhanced	2023-10-23 12:19:34	17	female								(+)
MR, wrist, left, unenhanced	2023-09-16 11:21:50	40	female		ganglion		edema in the lunate
MR, wrist, left, unenhanced	2021-08-09 13:50:03	40	female
MR, wrist, left, unenhanced	2021-09-10 20:50:04	51	female					strai̇n in abductor di̇gi̇ti̇mi̇ni̇mi
MR, wrist, left, unenhanced	2021-11-08 09:57:05	47	male		ganglion		scaphoid lunate capitate and trapezoidal cysts
MR, wrist, left, unenhanced	2021-11-20 13:50:40	49	female	negative
MR, wrist joint (left)	2016-01-08 09:56:43	49	female
MR, wrist joint (right)	2016-04-04 20:55:31	59	male
MR, wrist joint (left)	2016-03-28 13:18:34	59	female
MR, wrist joint (left)	2016-03-30 14:32:20	35	female		ganglion
MR, wrist joint (left)	2016-03-09 16:57:32	33	female
MR, wrist joint (right)	2016-03-14 09:41:53	42	female				scaphoid lunate capitate and trapezoidal cysts
MR, wrist joint (left)	2016-03-09 10:28:41	46	male
MR, wrist joint (left)	2016-03-09 10:47:30	28	male								(+)
MR, wrist joint (left)	2016-06-14 15:14:22	44	female								(+)
MR, wrist joint (right)	2016-05-16 09:45:52	35	male		ganglion	extensor tendinosis	cyst in lunate
MR, wrist joint (left)	2016-04-26 09:01:23	83	female				cyst in lunate		deformation
MR, wrist joint (left)	2016-05-25 15:21:07	48	female				scaphoid, pisiform and trapezoid bone
MR, wrist joint (right)	2016-07-21 20:43:30	38	male		ganglion
MR, wrist joint (right)	2016-07-28 13:50:13	60	female				contusion/medullary edema in the medulla of the distal end of the radius, scaphoid, lunate and trapezoid bone medulla
MR, wrist joint (left)	2016-08-16 13:51:39	55	female								(+)
MR, wrist joint (left)	2016-08-17 09:31:40	32	female	negative
MR, wrist joint (right)	2016-09-02 12:23:44	44	female	negative
MR, wrist joint (right)	2016-09-05 13:38:01	48	male	negative	ganglion				TFCC ulnar avulsion
MR, wrist joint (right)	2016-08-04 10:44:23	50	female			de quervain tenosynovitis
MR, wrist joint (right)	2016-08-04 14:21:53	44	female
MR, wrist joint (right)	2016-08-08 11:56:25	31	male								(+)
MR, wrist joint (left)	2016-08-09 15:58:44	48	male				contusion of the scaphoid bone medulla
MR, wrist joint (right)	2016-08-22 21:52:52	26	female				scaphoid cyst lunate cyst
MR, wrist joint (left)	2016-10-24 13:56:38	37	male
MR, wrist joint (left)	2016-09-28 13:17:31	37	male
MR, wrist joint (left)	2016-11-14 21:34:30	47	female				cyst in trapezoid
MR, wrist joint (right)	2016-11-29 10:23:55	44	male	negative			triquetrum cyst		TFCC ki̇st
MR, wrist joint (right)	2016-12-21 08:45:22	50	female	negative
MR, wrist joint (right)	2016-12-02 10:31:57	37	male	positive
MR, wrist joint (right)	2016-12-20 11:39:50	32	male		ganglion
MR, wrist joint (left)	2016-12-30 10:38:09	34	male	negative			edema of the scaphoid		ucl sprain, TFCC rupture
MR, wrist joint (left)	2017-02-13 12:34:29	63	female	negative		de quervain tenosynovitis
MR, wrist joint (left)	2017-02-01 13:09:24	62	female				trapezoidal cyst lunate and radius edema 1st metacarpal cyst
MR, wrist joint (right)	2017-01-25 16:42:44	48	male
MR, wrist joint (right)	2017-01-19 10:56:03	28	male	negative			cyst in scaphoid
MR, wrist joint (left)	2017-01-18 14:19:37	31	male	negative						medi̇an nerve neuroma
MR, wrist joint (left)	2017-03-07 13:44:53	28	male				edema in the lunate
MR, wrist joint (right)	2017-03-13 18:21:59	45	female	negative		extensor carpi radialis longus and extensor pollicis longus (tendinosis)	cyst in the lunate
MR, wrist joint (right)	2017-02-21 12:07:49	32	male	negative	ganglion
MR, wrist joint (right)	2017-04-18 15:04:10	36	male	negative			lunate and plexiform edema		rupture
MR, wrist joint (right)	2017-05-15 12:12:10	63	female			de quervain tenosynovitis	edema in the psiform
MR, wrist joint (left)	2017-05-16 18:13:46	40	female			de quervain tenosynovitis	cyst in scafoid
MR, wrist joint (left)	2017-04-03 22:11:13	38	female	negative		there is increased fluid signalling around the extensor carpi ulnaris tendon (tendinosis)
MR, wrist joint (right)	2017-05-09 12:56:00	45	male	negative			cyst in trapesoid, pisiform, triquetrum, trapesoid, capitate and hamate edema		rupture
MR, wrist joint (right)	2017-05-09 21:30:35	24	male	negative	ganglion
MR, wrist joint (left)	2017-05-06 12:47:55	50	female				edema in the 1st metacarpal and trapezoidal bone
MR, wrist joint (right)	2017-07-17 13:13:26	34	female	negative			ganglion in the hamate
MR, wrist joint (left)	2017-06-21 17:11:45	25	male	negative
MR, wrist joint (right)	2017-06-05 14:09:39	38	male				scaphoid edema trapezoidal cyst
MR, wrist joint (right)	2017-06-06 11:48:52	46	female				cyst in the lunate
MR, wrist joint (left)	2017-06-19 12:13:31	45	female		ganglion
MR, wrist joint (left)	2017-08-11 11:52:59	38	male								(+)
MR, wrist joint (left)	2017-09-14 17:00:19	43	female			extensor carpi ulnaris tendinosis
MR, wrist joint (right)	2017-08-19 11:29:46	52	male			extensor carpi ulnaris tendinosis
MR, wrist joint (left)	2017-11-10 21:44:07	19	female	negative	ganglion
MR, wrist joint (left)	2017-11-10 23:13:22	38	female
MR, wrist joint (left)	2017-10-17 12:44:23	60	female				trapezoidal cyst triquetrum and edema at the distal end of the ulna		rupture
MR, wrist joint (right)	2017-10-17 13:09:17	34	male	negative	ganglion
MR, wrist joint (left)	2017-10-18 13:02:27	38	female		ganglion
MR, wrist joint (right)	2017-10-09 10:59:36	27	male		ganglion		edema of the scaphoid
MR, wrist joint (left)	2017-10-19 15:30:03	48	male	negative	ganglion				rupture
MR, wrist joint (left)	2017-10-05 10:17:30	27	female	negative
MR, wrist joint (left)	2017-10-14 13:18:58	35	female		ganglion
MR, wrist joint (right)	2017-09-21 16:49:33	49	male								(+)
MR, wrist joint (right)	2017-10-02 09:42:15	25	male								(+)
MR, wrist joint (right)	2017-09-23 11:21:13	47	female		ganglion
MR, wrist joint (right)	2017-10-31 10:50:27	73	male	negative					rupture
MR, wrist joint (right)	2017-11-02 11:00:30	68	male	positive			edema of the scaphoid lunate and trapezoid
MR, wrist joint (right)	2017-09-30 07:52:10	28	female
MR, wrist joint (right)	2017-12-27 09:52:15	43	female	positive	ganglion
MR, wrist joint (left)	2017-12-28 13:19:26	24	male
MR, wrist joint (right)	2017-11-23 11:59:26	39	female	negative (impingement)					rupture
MR, wrist joint (left)	2017-12-09 15:02:28	35	female	positive (impaction)	ganglion		ki̇enböck
MR, wrist joint (left)	2017-11-13 09:24:16	73	female				pisiform cyst
MR, wrist joint (right)	2017-11-30 13:32:27	26	female		ganglion
MR, wrist joint (right)	2017-12-11 09:40:27	41	female
MR, wrist joint (left)	2018-02-17 10:38:28	21	female
MR, wrist joint (left)	2018-01-05 14:40:53	37	female
MR, wrist joint (right)	2018-03-14 13:24:58	43	male
MR, wrist joint (right)	2018-03-31 12:25:49	54	female	negative			cyst in the lunate		rupture
MR, wrist joint (right)	2018-03-28 13:15:52	52	female	negative	ganglion
MR, wrist joint (left)	2018-03-29 12:51:01	47	female
MR, wrist joint (left)	2018-05-31 15:28:21	65	male								(+)
MR, wrist joint (left)	2018-05-28 13:28:25	63	female	positive (impaction)			ki̇enböck		rupture ucl sprain
MR, wrist joint (right)	2018-05-07 10:31:19	51	male	positive
MR, wrist joint (left)	2018-05-07 11:00:09	21	male
MR, wrist joint (left)	2018-06-05 15:58:10	34	male							giant cell tumor
MR, wrist joint (left)	2018-05-08 16:47:14	31	female	negative	ganglion
MR, wrist joint (right)	2018-04-26 10:00:31	28	female	negative			cyst on trapezoid
MR, wrist joint (right)	2018-04-18 09:12:32	31	female								(+)
MR, wrist joint (left)	2018-08-07 21:08:26	44	female	positive		extensor pollicis brevis and abductor pollicis longus tendinosis and de quervain's tenosynovitis
MR, wrist joint (right)	2018-06-18 09:35:18	31	female
MR, wrist joint (right)	2018-06-21 09:28:31	31	female	negative	ganglion
MR, wrist joint (left)	2018-07-09 15:42:42	29	female								(+)
MR, wrist joint (left)	2018-07-11 09:45:59	41	male	negative
MR, wrist joint (right)	2018-06-29 14:57:37	45	female	negative					ulnar homolog rupture
MR, wrist joint (left)	2018-06-30 10:52:15	50	male								(+)
MR, wrist joint (left)	2018-07-02 10:45:42	28	male								(+)
MR, wrist joint (right)	2018-06-26 17:59:14	63	female		ganglion	2. there is fluid signal increase around the flexor tendon of the 2nd finger (tendinosis)
MR, wrist joint (left)	2018-10-16 12:40:07	58	female	negative			carpal bone cysts
MR, wrist joint (right)	2018-09-19 12:51:47	60	female			increased fluid signal in extensor pollicis brevis and abductor pollicis longus (de quervain's tenosynovitis)	radius and lunate edema
MR, wrist joint (left)	2018-10-11 13:58:34	55	female		ganglion
MR, wrist joint (right)	2018-10-06 12:41:45	35	male		ganglion
MR, wrist joint (right)	2018-09-27 12:55:38	41	female	negative
MR, wrist joint (right)	2018-11-07 09:47:46	40	female	negative		increased fluid signal around abductor pollicis longus and extensor pollicis brevis tendons (de quervain's tenosynovitis)
MR, wrist joint (left)	2018-12-13 11:09:03	26	female		ganglion
MR, wrist joint (right)	2018-12-13 15:36:01	29	female	negative		3.extensor tendon (tendinosis)
MR, wrist joint (right)	2018-12-15 13:52:53	65	male								(+)
MR, wrist joint (right)	2018-11-06 14:14:22	36	female	negative
MR, wrist joint (right)	2018-12-17 09:18:23	27	male	negative
MR, wrist joint (left)	2018-12-07 09:14:42	30	female	negative			kienböck
MR, wrist joint (left)	2018-11-07 09:48:27	40	female								(+)
MR, wrist joint (right)	2018-12-20 15:19:46	29	male								(+)
MR, wrist joint (left)	2019-02-07 13:58:44	39	female	negative						palmar venous thrombosis
MR, wrist joint (left)	2019-01-07 16:32:22	27	female		ganglion
MR, wrist joint (right)	2019-02-16 12:15:40	22	female	negative
MR, wrist joint (left)	2019-02-16 12:16:38	22	female	negative
MR, wrist joint (right)	2019-02-21 12:24:50	27	male	negative			medullary edema of scaphoid, lunate, capitate and hamate bones ulnar styloid no
MR, wrist joint (left)	2019-03-02 12:01:30	34	female	negative	ganglion
MR, wrist joint (left)	2019-03-23 12:01:15	38	male								(+)
MR, wrist joint (right)	2019-03-05 12:46:35	27	female	negative	ganglion
MR, wrist joint (right)	2019-03-20 13:08:56	69	male	negative		increased fluid signal around the extensor carpi ulnaris tendon (tendinosis)			rupture
MR, wrist joint (right)	2019-03-29 12:10:10	70	female			increased fluid signalling around the extensor carpi ulnaris tendon (tendinosis)			rupture		(+)
MR, wrist joint (right)	2019-04-04 17:17:18	45	female	negative
MR, wrist joint (right)	2019-03-07 15:44:14	54	male	negative		de quervain tenosynovitis	medullary edema of the scaphoid, lunate and tricuetral bones		rupture
MR, wrist joint (right)	2019-04-16 09:21:58	17	male								(+)
MR, wrist joint (left)	2019-06-12 16:50:17	60	female	negative		de quervain tenosynovitis	edema at the radial distal tip
MR, wrist joint (left)	2019-04-20 13:22:16	47	male	negative
MR, wrist joint (right)	2019-04-24 15:17:34	50	female	positive (impaction)	ganglion	de quervain tenosynovitis	lunate and plexiform cyst		rupture
MR, wrist joint (left)	2019-04-27 13:39:50	32	female		ganglion
MR, wrist joint (right)	2019-05-13 16:36:23	18	male								(+)
MR, wrist joint (right)	2019-07-22 14:45:02	32	male	negative			radius lunate and plexiform cyst
MR, wrist joint (left)	2019-07-09 12:30:30	39	female
MR, wrist joint (left)	2019-07-12 15:27:43	56	female
MR, wrist joint (right)	2019-08-28 14:56:41	38	male		ganglion				rupture
MR, wrist joint (left)	2019-06-27 18:18:34	24	female	negative			trapezoidal cyst
MR, wrist joint (left)	2019-08-15 14:58:07	44	female								(+)
MR, wrist joint (right)	2019-10-19 10:32:37	47	male			de quervain tenosynovitis
MR, wrist joint (left)	2019-10-14 17:45:13	19	female				trapezoidal cyst
MR, wrist joint (right)	2019-10-12 12:29:17	31	female	negative	ganglion
MR, wrist joint (left)	2019-11-20 12:03:24	52	female								(+)
MR, wrist joint (left)	2019-12-23 12:01:36	39	female		ganglion
MR, wrist joint (right)	2019-11-13 09:51:27	29	male	negative
MR, wrist joint (left)	2019-12-02 14:02:35	33	male	negative		de quervain tenosynovitis
MR, wrist joint (right)	2020-02-10 12:14:53	41	female	negative
MR, wrist joint (right)	2020-02-10 14:36:20	18	male				trapezoid and hamate edema				(+)
MR, wrist joint (left)	2020-01-17 11:55:03	37	male
MR, wrist joint (left)	2020-02-15 12:21:39	45	male
MR, wrist joint (left)	2020-02-27 09:37:23	50	female				kienböck		rupture
MR, wrist joint (left)	2020-02-28 16:03:32	21	male	positive
MR, wrist joint (right)	2020-03-09 13:23:56	14	female								(+)
MR, wrist joint (right)	2020-08-24 14:48:08	28	male				2nd metacarpal edema		rupture
MR, wrist joint (right)	2020-06-03 11:50:08	21	male	positive	ganglion
MR, wrist joint (left)	2020-06-16 13:35:15	55	female						rupture
MR, wrist joint (right)	2020-05-11 15:25:10	59	female				kienböck		rupture
MR, wrist joint (left)	2020-09-04 14:48:53	25	female
MR, wrist joint (left)	2020-06-19 13:14:00	49	male	negative			kienböck		rupture
MR, wrist joint (right)	2020-09-18 09:43:14	37	male	negative					rupture
MR, wrist joint (left)	2020-07-03 11:46:33	43	female		ganglion		kienböck		rupture
MR, wrist joint (right)	2020-07-11 10:05:57	46	female	negative	ganglion		edema in ulna styloid
MR, wrist joint (right)	2020-06-09 10:46:35	26	female	negative					rupture
MR, wrist joint (right)	2020-06-09 11:14:39	33	male	negative		extensor pollicis brevis tendinosis
MR, wrist joint (right)	2020-04-20 12:20:14	35	male								(+)
MR, wrist joint (right)	2020-08-04 09:58:32	45	female						rupture
MR, wrist joint (left)	2020-09-28 14:16:57	41	female
MR, wrist joint (left)	2020-08-07 12:23:29	49	male						deformation
MR, wrist joint (right)	2020-11-23 11:29:37	55	female	positive (impaction)		sprain in extensor tendons			rupture
MR, wrist joint (left)	2020-12-11 12:59:10	26	female
MR, wrist, right, unenhanced	2021-08-24 13:00:04	28	male	negative
MR, wrist, left, unenhanced	2021-11-11 10:04:37	50	female				edema lunate and capitate cyst in pisiform
MR, wrist joint (left)	2021-04-13 11:32:56	50	female	negative
MR, wrist, right, unenhanced	2021-12-21 10:52:06	49	male						rupture		(+)
MR, wrist, left, unenhanced	2021-12-24 13:54:17	37	female		ganglion	extensor carpi radialis longus and brevis tendinosis
MR, wrist, right, unenhanced	2021-10-18 14:55:47	27	female	negative					rupture
MR, wrist, left, unenhanced	2021-06-17 14:46:37	59	female
MR, wrist, right, unenhanced	2021-11-29 16:29:28	26	female	negative (impingement)			trapezoidal cyst		deformation
MR, wrist, right, unenhanced	2021-12-15 12:27:48	29	male								(+)
MR, wrist joint (right)	2021-04-17 11:20:24	72	female
MR, wrist joint (right)	2021-01-13 09:29:36	42	male						deformation
MR, wrist joint (right)	2021-03-10 13:58:14	19	female	negative (impingement)	ganglion
MR, wrist, left, unenhanced	2021-09-24 13:48:44	35	female		ganglion				deformation
MR, wrist, right, contrast enhanced	2021-06-16 13:52:51	15	male							hemangioma at wrist dorsum	(+)
MR, wrist joint (left)	2021-03-15 11:58:38	68	female								(+)
MR, wrist joint (left)	2021-05-17 14:37:50	40	female	positive	ganglion		edema in the lunate		rupture	synovial cyst
MR, wrist, right, unenhanced	2021-08-27 14:48:53	49	female				cyst in the lunate
MR, wrist joint (left)	2021-04-10 11:29:20	50	male			scapholunate ligament rupture			rupture
MR, wrist, right, unenhanced	2021-09-24 14:47:02	27	female		ganglion
MR, wrist, right, unenhanced	2021-12-24 11:51:16	26	female		ganglion
MR, wrist, left, unenhanced	2021-12-14 15:13:22	38	female	negative			trapezoidal cyst
MR, wrist, right, unenhanced	2021-12-18 13:51:02	28	female								(+)
MR, wrist, left, unenhanced	2021-09-17 14:14:41	42	female		ganglion
MR, wrist joint (left)	2021-05-31 09:18:24	46	female	negative	ganglion	flexor pollicis longus tendinosis	edema in hamate and triquetrum		rupture
MR, wrist joint (right)	2021-01-22 13:41:36	46	female			flexor pollicis longus tendinosis	necrosis of ulnar styloid		rupture
MR, wrist joint (right)	2021-01-30 11:22:18	42	female	negative			edema in styloid
MR, wrist, left, unenhanced	2022-12-05 13:32:04	49	female	positive					deformation
MR, wrist, left, unenhanced	2022-02-07 12:18:53	58	female	negative			1st metacarpal proximal end, trapezium, capitatum and triquetrum edema		deformation
MR, wrist, right, unenhanced	2022-07-01 13:51:09	34	female				lunate and hamate medullary edema
MR, wrist, right, unenhanced	2022-03-18 14:19:15	34	male	positive		ucl rupture
MR, wrist, left, unenhanced	2022-05-27 16:26:36	33	female
MR, wrist, left, unenhanced	2022-11-28 13:38:15	40	female		ganglion
MR, wrist, left, unenhanced	2022-09-26 15:49:13	26	female	negative	ganglion
MR, wrist, left, unenhanced	2022-10-31 13:13:22	49	female				cyst in the capitate and scaphoid
MR, wrist, left, unenhanced	2022-10-19 11:42:23	43	female			extensor carpi ulnaris tendinosis	kienböck capitate cyst		rupture
MR, wrist, left, unenhanced	2022-11-07 17:01:22	39	male	negative	ganglion	scapholunate ligament rupture	edema in lunate, pisiform, capitate and hamate		rupture
MR, wrist, left, unenhanced	2022-06-01 11:08:42	49	female	negative			kienböck capitate cyst		rupture
MR, wrist, right, unenhanced	2022-03-22 10:06:11	47	female	negative					rupture	3.metakarpta enkondrom
MR, wrist, left, unenhanced	2022-07-22 15:14:53	24	male				edema in hamat		deformation
MR, wrist, right, unenhanced	2022-09-08 10:24:54	32	male		ganglion		edema in all carpal bones		deformation
MR, wrist, right, unenhanced	2022-10-21 14:13:15	24	female	positive			trapezoidal cyst		rupture
MR, wrist, right, unenhanced	2022-02-18 14:56:21	40	female	negative	ganglion		cyst in scafoid
MR, wrist, left, unenhanced	2022-06-09 10:21:00	38	female		ganglion		fragmantation of the styloid				(+)
MR, wrist, left, unenhanced	2022-07-20 14:43:35	36	female						rupture		(+)
MR, wrist, left, unenhanced	2022-02-21 12:39:58	27	female	negative
MR, wrist, right, unenhanced	2022-11-25 12:06:07	63	female	positive (impaction) and impingement					rupture
MR, wrist, left, contrast enhanced	2023-03-28 12:20:59	24	female
MR, wrist, left, unenhanced	2023-01-02 13:12:13	29	female		ganglion				deformation
MR, wrist, right, contrast enhanced	2023-01-19 11:25:31	68	female	negative			cysts in the carpal bones			karpal tünelde li̇pom
MR, wrist, left, unenhanced	2023-03-06 13:23:00	49	female	negative							(+)
